# Supplementary material for: The activation of the oxidative stress response transcription factor SKN-1 in Caenorhabditis elegans by mitis group streptococci
Source: PubMed Central journal article supplement (PMC6095534; doi:10.1371/journal.pone.0202233), 2018-08-16
Supplement: pone.0202233.s005.pdf [file pone.0202233.s005.pdf]

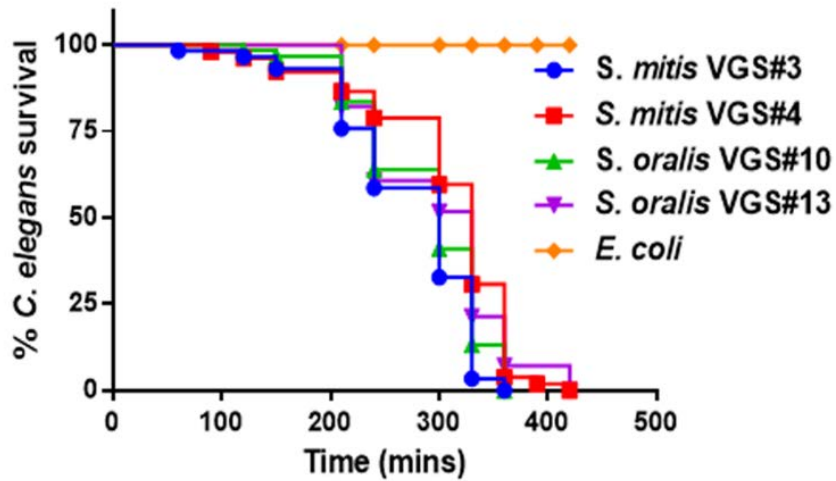

**S3 Fig. Clinical isolates of the mitis group streptococci rapidly kill the worms.** Survival of N2 L4 larvae exposed to *S. oralis* (VGS#3), *S. oralis* (VGS#4), *S. mitis* (VGS#10), *S. mitis* (VGS#13) and *E. coli* OP50 on THY plates. The data are representative of experiments repeated two or more times with an n = 60 – 90 worms for each condition. Kaplan-Meier log rank analysis was used to compare survival curves and to calculate the median survival. P-values <0.05 were considered to be statistically significant.
