# Supplementary material for: The activation of the oxidative stress response transcription factor SKN-1 in Caenorhabditis elegans by mitis group streptococci
Source: PubMed Central journal article supplement (PMC6095534; doi:10.1371/journal.pone.0202233), 2018-08-16
Supplement: pone.0202233.s006.pdf [file pone.0202233.s006.pdf]

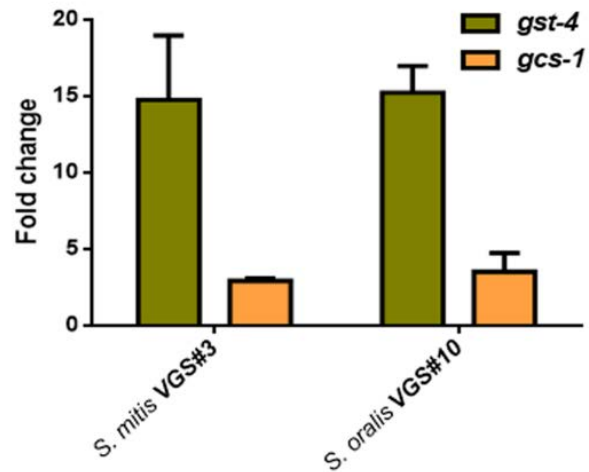

**S4 Fig. Phase II genes are upregulated in response to H<sub>2</sub>O<sub>2</sub> produced by clinical isolates of the mitis group streptococci.** qRT-PCR analysis of Phase II genes *gst-4* and *gcs-1* induced in worms fed for 2 hours on *S. oralis* (VGS#3), *S. mitis* (VGS#10) and *E. coli* OP50. Experiments were performed with three separate replicates; each replicate was measured in duplicate and standardized to the control gene *act-1*. Error bars represent the standard error of the mean (SEM), P<0.001.
