# Supplementary material for: The activation of the oxidative stress response transcription factor SKN-1 in Caenorhabditis elegans by mitis group streptococci
Source: PubMed Central journal article supplement (PMC6095534; doi:10.1371/journal.pone.0202233), 2018-08-16
Supplement: pone.0202233.s007.pdf [file pone.0202233.s007.pdf]

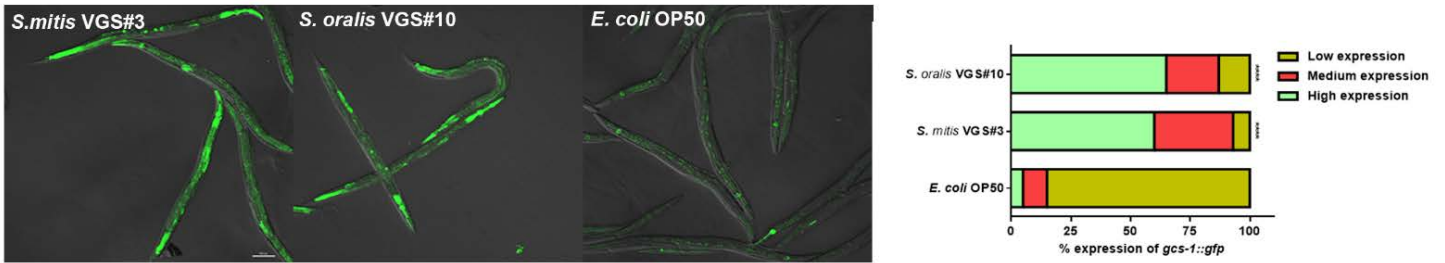

**S5 Fig. Significantly high levels of *gcs-1::gfp* expression in worms exposed to the clinical isolates of the mitis group streptococci.** Representative images of *gcs-1::gfp* expression in worms exposed to *S. oralis* (VGS#3), *S. mitis* (VGS#10) and *E. coli* OP50 for 2 hours. The level of *gcs-1::gfp* expression and the percentage of worms in each category fed on *S. oralis* (VGS#3), *S. mitis* (VGS#10) and *E. coli* OP50. A total of more than 100 worms exposed to each strain were imaged and the experiment was repeated 3 times. Significantly high levels of *gcs-1::gfp* expression in worms was observed on *S. oralis* (VGS#3) and *S. mitis* (VGS#10) ( $P < 0.0001$ ) compared to *E. coli* OP50.
