# Supplementary material for: The activation of the oxidative stress response transcription factor SKN-1 in Caenorhabditis elegans by mitis group streptococci
Source: PubMed Central journal article supplement (PMC6095534; doi:10.1371/journal.pone.0202233), 2018-08-16
Supplement: pone.0202233.s008.pdf [file pone.0202233.s008.pdf]

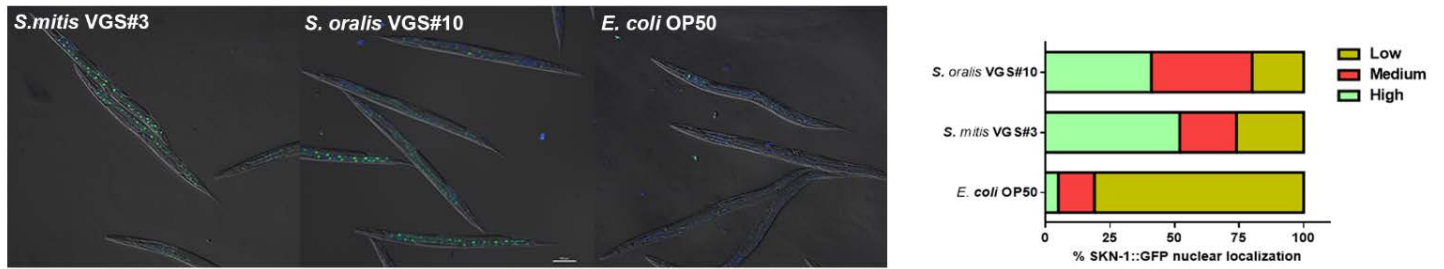

**S6 Fig. Significantly high levels of SKN-1B/C::GFP localization in worms exposed to the clinical isolates of the mitis group streptococci.** Representative images of the localization of SKN-1B/C::GFP in worms exposed to t *S. oralis* (VGS#3), *S. mitis* (VGS#10) and *E. coli* OP50.for 2 hours. The degree of nuclear localization of SKN-1B/C::GFP and the percentage of worms in each category fed on *S. oralis* (VGS#3), *S. mitis* (VGS#10) and *E. coli* OP50. A total of more than 100 worms exposed to each strain were imaged and the experiment was repeated 3 times. Significantly high levels of nuclear localization of SKN-1B/C::GFP were observed in worms on *S. oralis* (VGS#3) and *S. mitis* (VGS#10) strains ( $P < 0.0001$ ) compared to *E. coli* OP50.
